# Supplementary material for: Modeling Enzyme Processivity Reveals that RNA-Seq Libraries Are Biased in Characteristic and Correctable Ways
Source: PubMed Central journal article supplement (PMC5167349; doi:10.1016/j.cels.2016.10.012), 2016-11-23
Supplement: mmc1.pdf [file mmc1.pdf]

**Cell Systems, Volume 3**

**Supplemental Information**

**Modeling Enzyme Processivity Reveals  
that RNA-Seq Libraries Are Biased  
in Characteristic and Correctable Ways**

**Nathan Archer, Mark D. Walsh, Vahid Shahrezaei, and Daniel Hebenstreit**

SUPPLEMENTAL FIGURES

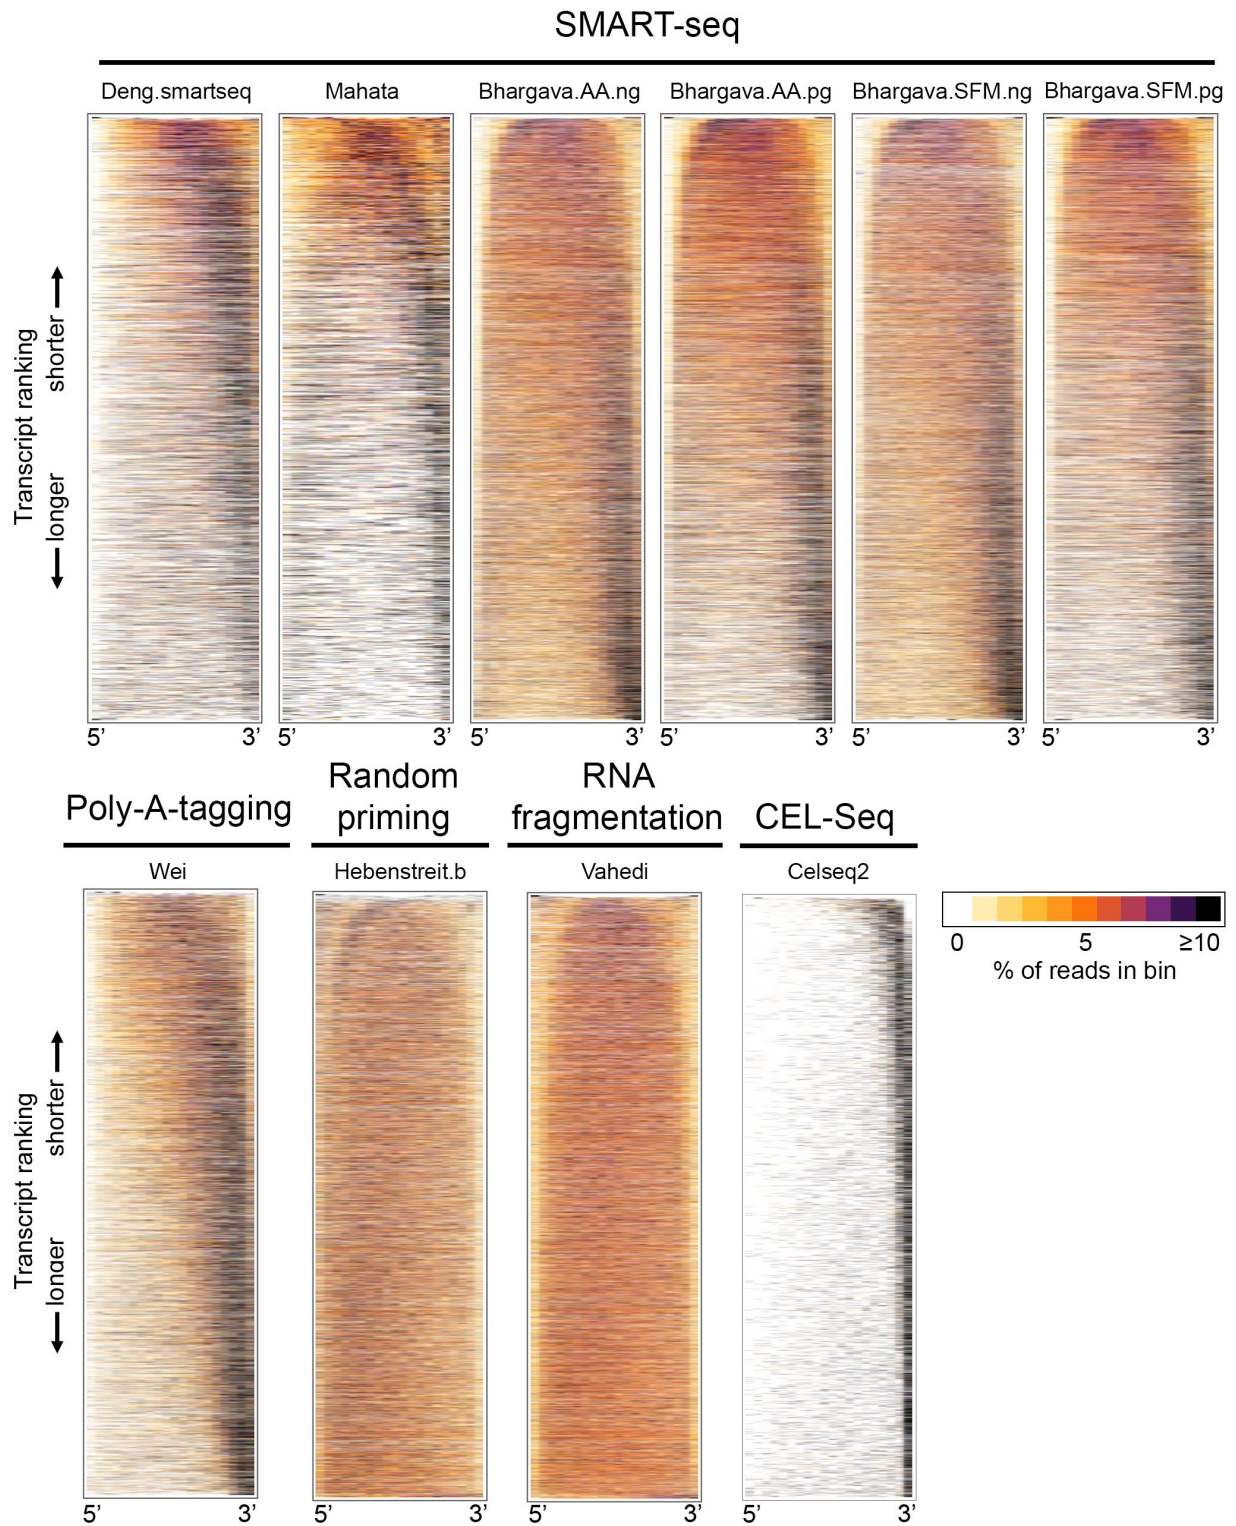

**Figure S1. Related to Figure 1. Related to Table 1.** RNA-seq coverage along transcripts for different datasets as in Figure 1C. Details of the datasets shown are listed in Table 1.

**a**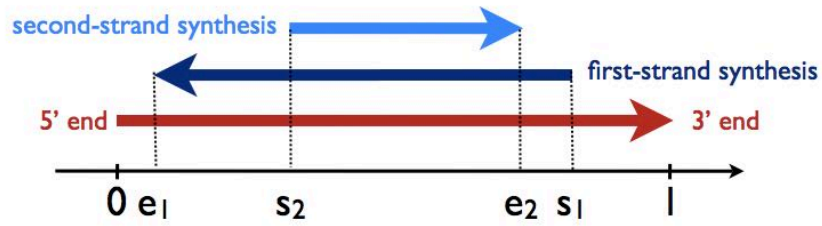**b**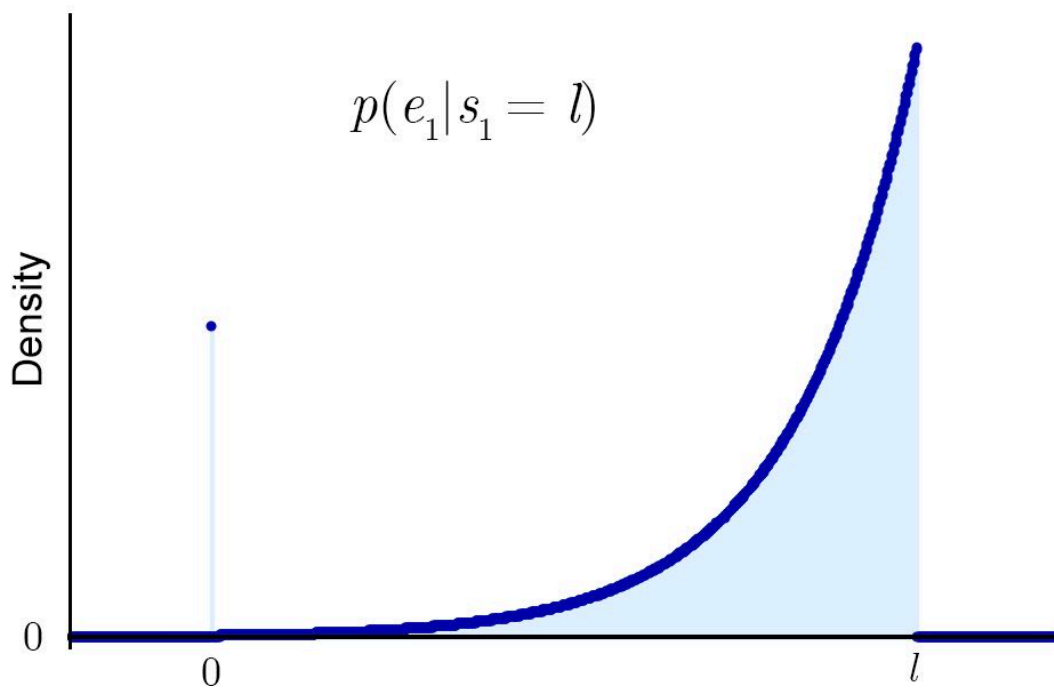

**Figure S2. Related to Figure 1. Related to Derivation of models (method details).** (a) Illustration of mRNA and first- and second-strand synthesis. (b) Graph of a typical stopping density for first-strand synthesis. If synthesis is based on poly-A tail priming, stopping positions decrease exponentially from the 3' end until the 5' end is reached, giving rise to a spike at the 5' end (position 0). The density equals zero outside the transcript length. Analogous the graph for  $p(e_2 | s_2)$ , mirrored horizontally and with different starting positions.

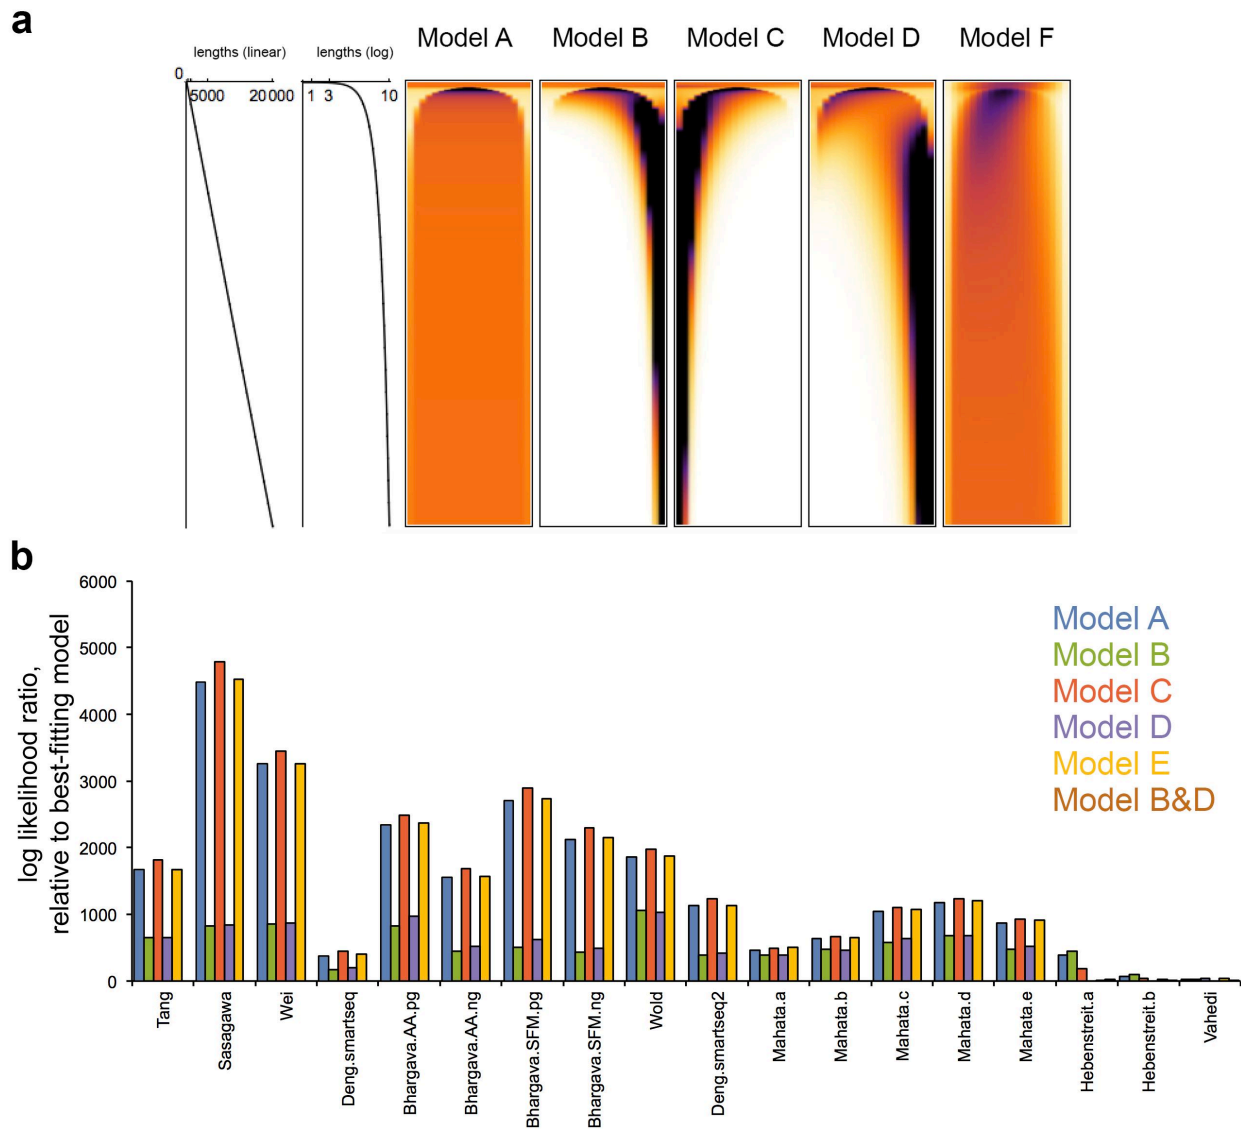

**Figure S3. Related to Figure 2.** (a) Coverage heatmaps for the different models A to E as in Figure 1C, using a transcript length distribution that linearly increases from 1 bp to 20 kb (bottom row). (b) Log likelihood ratios with respect to the best-fitting models for all models and relevant datasets used in this study. Best-fitting model in most cases is model B&D. The lower the value, the better the fit compared to the best model.

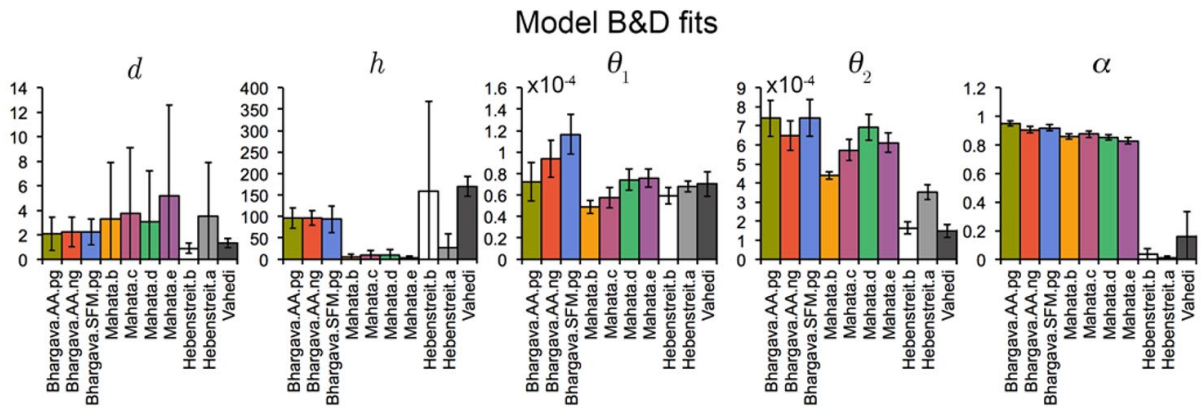

**Figure S4. Related to Figure 2.** MCMC parameter estimates for model B&D for datasets not shown in Figure 2C. The bar heights correspond to the medians, the error bars correspond to the median absolute deviations.

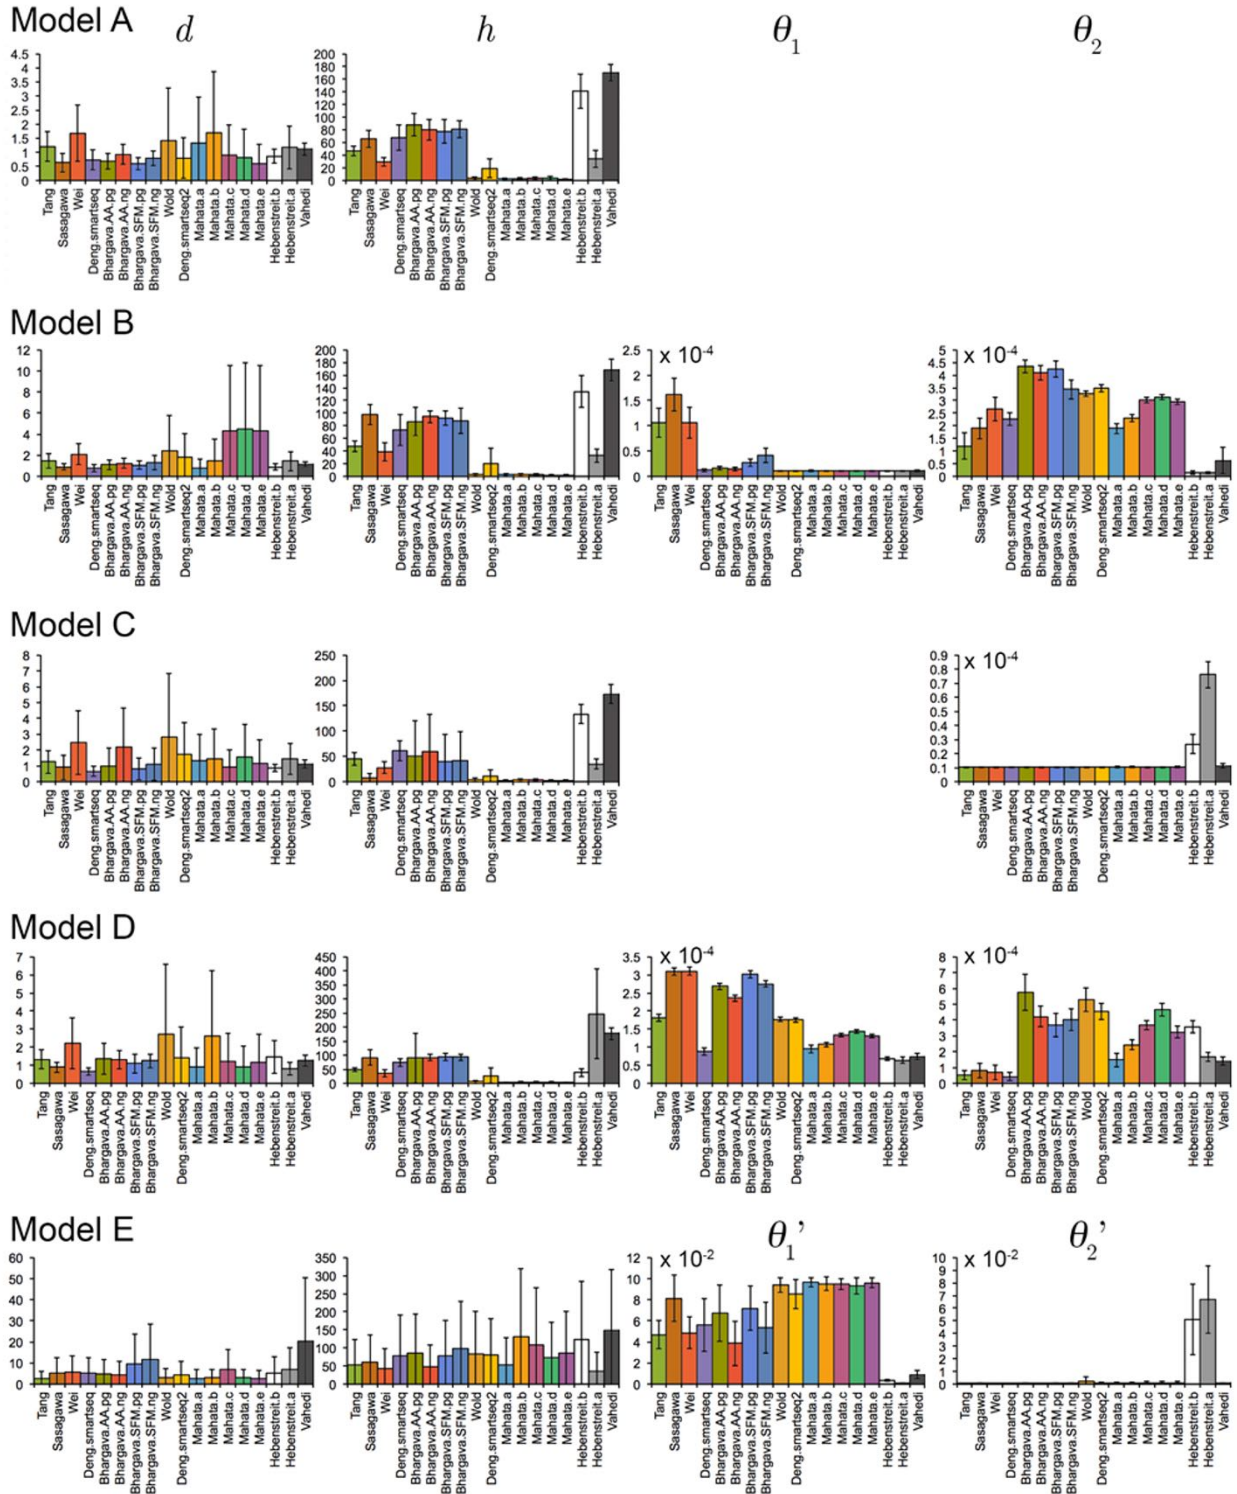

**Figure S5. Related to Figure 2.** MCMC parameter estimates for all relevant datasets and models except model B&D (Figure 2C; Figure S4). The bar heights correspond to the medians, the error bars correspond to the median absolute deviations.

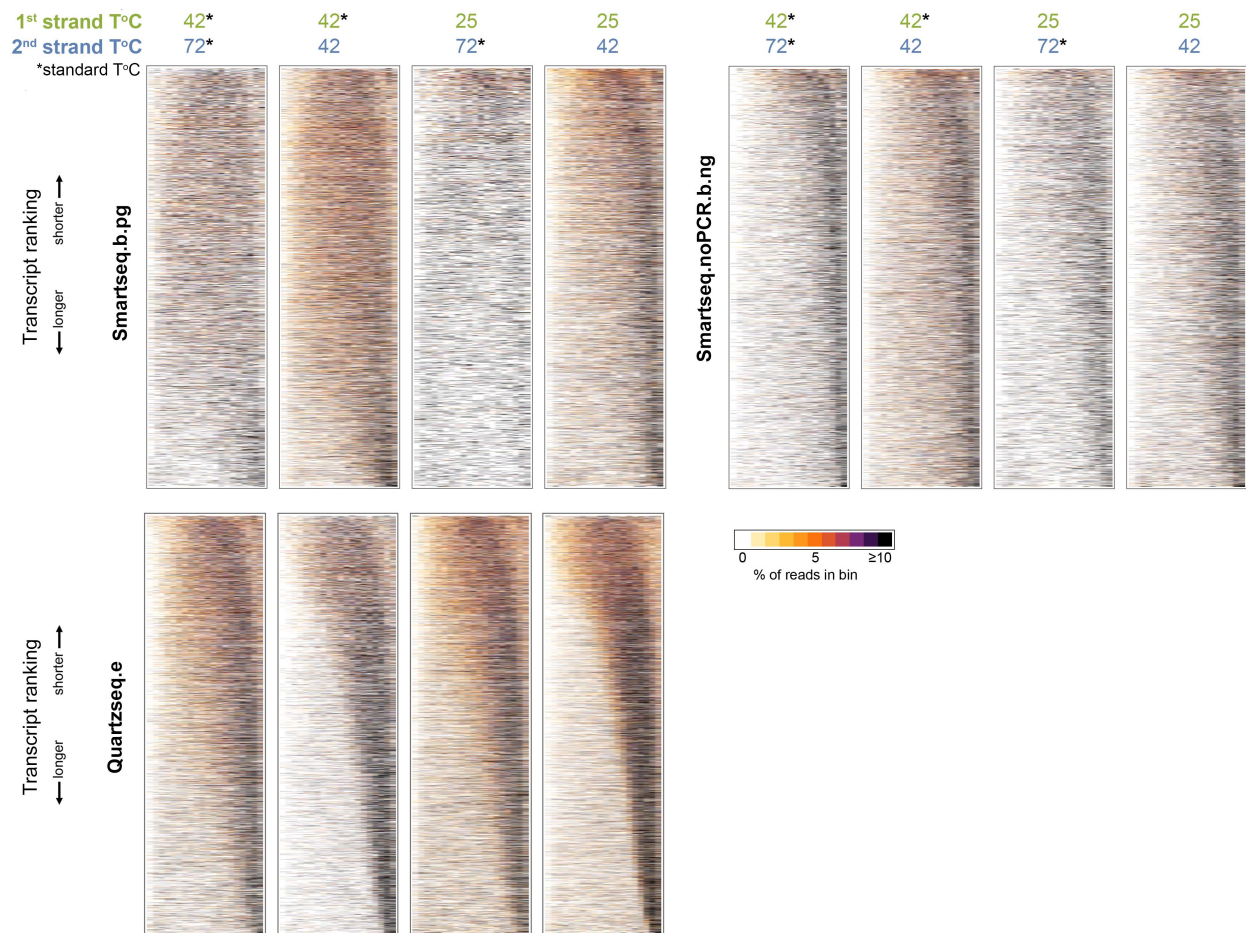

**Figure S6. Related to Figure 3.** Coverage heatmaps as in Figure 1C for a selection of RNA-seq samples prepared in this study as indicated. Transcripts are ordered by length. Four different combinations of incubation temperatures for first- and second-strand synthesis were used as indicated. ‘Standard’ temperatures are 42°C and 72°C for first- and second-strand, respectively, which were lowered to 25°C and 42°C, respectively, in the designated samples.

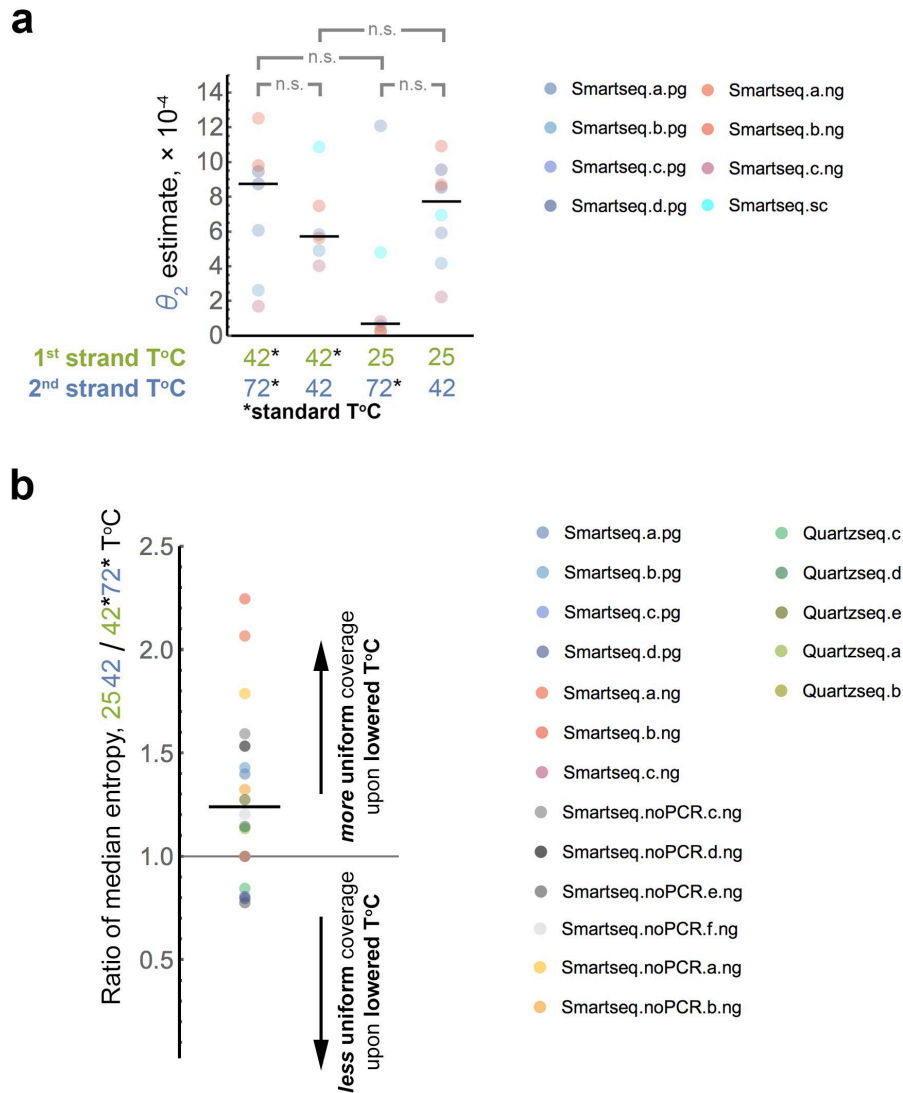

**Figure S7. Related to Figure 3; Figure 4. (a)** MCMC parameter estimates for  $\theta_2$  for diverse SMART-seq samples (Table S1, color code on right of figure) prepared with altered reaction temperatures during first- and second-strand syntheses. ‘Standard’ temperatures were 42°C and 72°C for first- and second-strand, respectively, which were lowered to 25°C and 42°C, respectively, in the designated samples (black horizontal lines indicate the median; n.s., one-sided Wilcoxon signed-rank tests). **(b)** Ratios of the average coverage uniformities between lowered incubation temperatures for first- and second-strand (25°C and 42°C, respectively) and ‘standard’ temperatures (42°C and 72°C, respectively). Sequencing reads along transcripts were binned in the same way as for the heatmaps (e.g. Figure 1c), and statistical entropy (as a measure of uniformity) was calculated for each transcript. The statistical entropy becomes maximal for uniform distributions. The medians of the resulting distributions were determined and are shown as ratios for the RNA-seq samples as indicated.



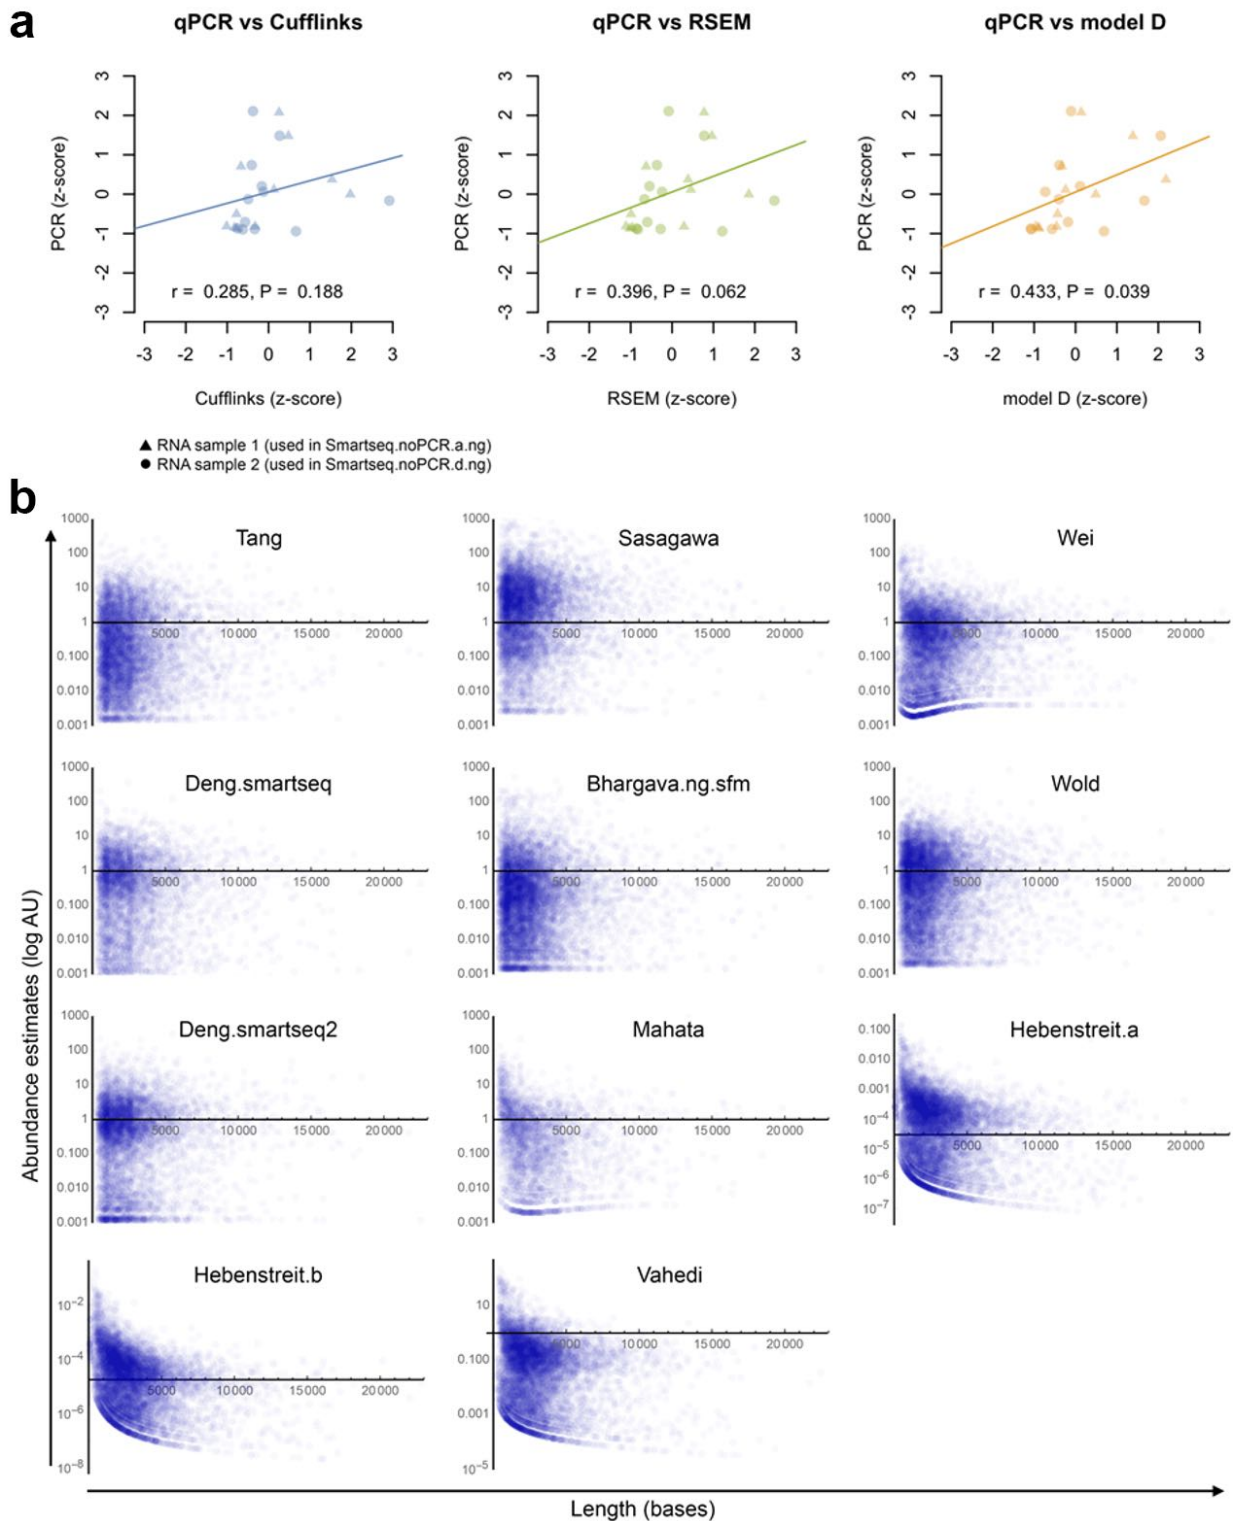

**Figure S8. Related to Figure 4. (a)** Comparison of RNA-seq abundance estimates with qPCR-based quantification. RNA-seq samples deriving from two different RNA samples (Table S1) were quantified by RSEM, Cufflinks, or our Model D as indicated for twelve different genes that cover a wide range of mRNA lengths (Table S2). In parallel, the corresponding two RNA samples (dots and triangle symbols, respectively) were subjected to qPCR for the same twelve genes. Each dot corresponds to one gene. Fitted trend lines and

Pearson's product moment correlation coefficient ( $r$ ) and its  $P$ -value are shown. Standardized measures ( $z$ -scores) are used to make the approaches comparable. **(b)** Abundance estimates vs. transcript lengths based on fitting our models. Vahedi (RNA-fragmentation) was fit with model A, Hebenstreit.a/b (random priming) with model E, all others (poly-A-tagging and SMART-seq) with model B&D.

## SUPPLEMENTAL TABLES

| Sample name                 | 1 <sup>st</sup> strand T°C | 2 <sup>nd</sup> strand T°C | Protocol          | Tissue     | Starting Material | used in qPCR & RNA-seq analysis | Used in $\theta_1$ perturbation analysis | Used in $\theta_2$ perturbation analysis | Used in sensitivity analysis (spike-in probes) | Used in length ratio & local bias analysis | Read numbers ( $\times 10^4$ ) |
|-----------------------------|----------------------------|----------------------------|-------------------|------------|-------------------|---------------------------------|------------------------------------------|------------------------------------------|------------------------------------------------|--------------------------------------------|--------------------------------|
| Quartzseq.a.r25ss42         | 25                         | 42                         | Quartz-seq        | Liver      | 100 ng Poly(A)+   |                                 | x                                        | x                                        | x                                              | x                                          | 903                            |
| Quartzseq.a.r25ss72         | 25                         | 72                         | Quartz-seq        | Liver      | 100 ng Poly(A)+   |                                 | x                                        | x                                        |                                                |                                            | 827                            |
| Quartzseq.a.r42ss42         | 42                         | 42                         | Quartz-seq        | Liver      | 100 ng Poly(A)+   |                                 | x                                        | x                                        |                                                |                                            | 501                            |
| Quartzseq.a.r42ss72         | 42                         | 72                         | Quartz-seq        | Liver      | 100 ng Poly(A)+   |                                 | x                                        | x                                        | x                                              | x                                          | 801                            |
| Quartzseq.b.r25ss42         | 25                         | 42                         | Quartz-seq        | Lymphocyte | 100 ng Poly(A)+   |                                 | x                                        | x                                        | x                                              | x                                          | 1051                           |
| Quartzseq.b.r25ss72         | 25                         | 72                         | Quartz-seq        | Lymphocyte | 100 ng Poly(A)+   |                                 | x                                        | x                                        |                                                |                                            | 1452                           |
| Quartzseq.b.r42ss42         | 42                         | 42                         | Quartz-seq        | Lymphocyte | 100 ng Poly(A)+   |                                 | x                                        | x                                        |                                                |                                            | 0.44                           |
| Quartzseq.b.r42ss72         | 42                         | 72                         | Quartz-seq        | Lymphocyte | 100 ng Poly(A)+   |                                 | x                                        | x                                        | x                                              | x                                          | 1554                           |
| Quartzseq.c.r25ss42         | 25                         | 42                         | Quartz-seq        | Lymphocyte | 100 ng Poly(A)+   |                                 | x                                        | x                                        | x                                              | x                                          | 1691                           |
| Quartzseq.c.r25ss72         | 25                         | 72                         | Quartz-seq        | Lymphocyte | 100 ng Poly(A)+   |                                 | x                                        | x                                        |                                                |                                            | 1447                           |
| Quartzseq.c.r42ss42         | 42                         | 42                         | Quartz-seq        | Lymphocyte | 100 ng Poly(A)+   |                                 | x                                        | x                                        |                                                |                                            | 1922                           |
| Quartzseq.c.r42ss72         | 42                         | 72                         | Quartz-seq        | Lymphocyte | 100 ng Poly(A)+   |                                 | x                                        | x                                        | x                                              | x                                          | 813                            |
| Quartzseq.d.r25ss42         | 25                         | 42                         | Quartz-seq        | Lymphocyte | 100 ng Poly(A)+   |                                 | x                                        | x                                        | x                                              | x                                          | 2407                           |
| Quartzseq.d.r25ss72         | 25                         | 72                         | Quartz-seq        | Lymphocyte | 100 ng Poly(A)+   |                                 | x                                        | x                                        |                                                |                                            | 2519                           |
| Quartzseq.d.r42ss42         | 42                         | 42                         | Quartz-seq        | Lymphocyte | 100 ng Poly(A)+   |                                 | x                                        | x                                        |                                                |                                            | 649                            |
| Quartzseq.d.r42ss72         | 42                         | 72                         | Quartz-seq        | Lymphocyte | 100 ng Poly(A)+   |                                 | x                                        | x                                        | x                                              | x                                          | 1753                           |
| Quartzseq.e.r25ss42         | 25                         | 42                         | Quartz-seq        | Lymphocyte | 100 ng Poly(A)+   |                                 | x                                        | x                                        | x                                              | x                                          | 1354                           |
| Quartzseq.e.r25ss72         | 25                         | 72                         | Quartz-seq        | Lymphocyte | 100 ng Poly(A)+   |                                 | x                                        | x                                        |                                                |                                            | 1255                           |
| Quartzseq.e.r42ss42         | 42                         | 42                         | Quartz-seq        | Lymphocyte | 100 ng Poly(A)+   |                                 | x                                        | x                                        |                                                |                                            | 743                            |
| Quartzseq.e.r42ss72         | 42                         | 72                         | Quartz-seq        | Lymphocyte | 100 ng Poly(A)+   |                                 | x                                        | x                                        | x                                              | x                                          | 1196                           |
| Smartseq.a.ng.r25ss42       | 25                         | 42                         | Smart-seq         | Lymphocyte | 100 ng Poly(A)+   |                                 | x                                        |                                          | x                                              | x                                          | 894                            |
| Smartseq.a.ng.r25ss72       | 25                         | 72                         | Smart-seq         | Lymphocyte | 100 ng Poly(A)+   |                                 | x                                        |                                          |                                                |                                            | 729                            |
| Smartseq.a.ng.r42ss42       | 42                         | 42                         | Smart-seq         | Lymphocyte | 100 ng Poly(A)+   |                                 | x                                        |                                          |                                                |                                            | 264                            |
| Smartseq.a.ng.r42ss72       | 42                         | 72                         | Smart-seq         | Lymphocyte | 100 ng Poly(A)+   |                                 | x                                        |                                          | x                                              | x                                          | 114                            |
| Smartseq.a.pg.r25ss42       | 25                         | 42                         | Smart-seq 2       | Liver      | 10 pg Total RNA   |                                 | x                                        |                                          | x                                              | x                                          | 2297                           |
| Smartseq.a.pg.r25ss72       | 25                         | 72                         | Smart-seq 2       | Liver      | 10 pg Total RNA   |                                 | x                                        |                                          |                                                |                                            | 928                            |
| Smartseq.a.pg.r42ss42       | 42                         | 42                         | Smart-seq 2       | Liver      | 10 pg Total RNA   |                                 | x                                        |                                          |                                                |                                            | 3956                           |
| Smartseq.a.pg.r42ss72       | 42                         | 72                         | Smart-seq 2       | Liver      | 10 pg Total RNA   |                                 | x                                        |                                          | x                                              | x                                          | 1481                           |
| Smartseq.b.ng.r25ss42       | 25                         | 42                         | Smart-seq         | Lymphocyte | 100 ng Poly(A)+   |                                 | x                                        |                                          | x                                              | x                                          | 1487                           |
| Smartseq.b.ng.r25ss72       | 25                         | 72                         | Smart-seq         | Lymphocyte | 100 ng Poly(A)+   |                                 | x                                        |                                          |                                                |                                            | 1190                           |
| Smartseq.b.ng.r42ss42       | 42                         | 42                         | Smart-seq         | Lymphocyte | 100 ng Poly(A)+   |                                 | x                                        |                                          |                                                |                                            | 1172                           |
| Smartseq.b.ng.r42ss72       | 42                         | 72                         | Smart-seq         | Lymphocyte | 100 ng Poly(A)+   |                                 | x                                        |                                          | x                                              | x                                          | 622                            |
| Smartseq.b.pg.r25ss42       | 25                         | 42                         | Smart-seq 2       | Liver      | 10 pg Total RNA   |                                 | x                                        |                                          | x                                              | x                                          | 977                            |
| Smartseq.b.pg.r25ss72       | 25                         | 72                         | Smart-seq 2       | Liver      | 10 pg Total RNA   |                                 | x                                        |                                          |                                                |                                            | 380                            |
| Smartseq.b.pg.r42ss42       | 42                         | 42                         | Smart-seq 2       | Liver      | 10 pg Total RNA   |                                 | x                                        |                                          |                                                |                                            | 893                            |
| Smartseq.b.pg.r42ss72       | 42                         | 72                         | Smart-seq 2       | Liver      | 10 pg Total RNA   |                                 | x                                        |                                          | x                                              | x                                          | 312                            |
| Smartseq.c.ng.r25ss42       | 25                         | 42                         | Smart-seq         | Lymphocyte | 100 ng Poly(A)+   |                                 | x                                        |                                          | x                                              | x                                          | 37                             |
| Smartseq.c.ng.r25ss72       | 25                         | 72                         | Smart-seq         | Lymphocyte | 100 ng Poly(A)+   |                                 | x                                        |                                          |                                                |                                            | 1013                           |
| Smartseq.c.ng.r42ss42       | 42                         | 42                         | Smart-seq         | Lymphocyte | 100 ng Poly(A)+   |                                 | x                                        |                                          |                                                |                                            | 639                            |
| Smartseq.c.ng.r42ss72       | 42                         | 72                         | Smart-seq         | Lymphocyte | 100 ng Poly(A)+   |                                 | x                                        |                                          | x                                              | x                                          | 9                              |
| Smartseq.c.pg.r25ss42       | 25                         | 42                         | Smart-seq 2       | Liver      | 10 pg Total RNA   |                                 | x                                        |                                          | x                                              | x                                          | 1159                           |
| Smartseq.c.pg.r42ss72       | 42                         | 72                         | Smart-seq 2       | Liver      | 10 pg Total RNA   |                                 | x                                        |                                          | x                                              | x                                          | 871                            |
| Smartseq.d.pg.r25ss42       | 25                         | 42                         | Smart-seq 2       | Liver      | 10 pg Total RNA   |                                 | x                                        |                                          | x                                              | x                                          | 2730                           |
| Smartseq.d.pg.r42ss72       | 42                         | 72                         | Smart-seq 2       | Liver      | 10 pg Total RNA   |                                 | x                                        |                                          | x                                              | x                                          | 1200                           |
| Smartseq.noPCR.a.ng.r25ss42 | 25                         | 42                         | Smart-seq, no PCR | Lymphocyte | 100 ng Poly(A)+   | x                               | x                                        | x                                        | x                                              | x                                          | 1530                           |
| Smartseq.noPCR.a.ng.r25ss72 | 25                         | 72                         | Smart-seq, no PCR | Lymphocyte | 100 ng Poly(A)+   | x                               | x                                        | x                                        |                                                |                                            | 445                            |

|                             |    |    |                   |                 |                 |   |   |   |   |   |       |
|-----------------------------|----|----|-------------------|-----------------|-----------------|---|---|---|---|---|-------|
| Smartseq.noPCR.a.ng.r42ss42 | 42 | 42 | Smart-seq, no PCR | Lymphocyte      | 100 ng Poly(A)+ | x | x | x |   |   | 836   |
| Smartseq.noPCR.a.ng.r42ss72 | 42 | 72 | Smart-seq, no PCR | Lymphocyte      | 100 ng Poly(A)+ | x | x | x | x | x | 452   |
| Smartseq.noPCR.b.ng.r25ss42 | 25 | 42 | Smart-seq, no PCR | Lymphocyte      | 100 ng Poly(A)+ |   | x | x | x | x | 1166  |
| Smartseq.noPCR.b.ng.r25ss72 | 25 | 72 | Smart-seq, no PCR | Lymphocyte      | 100 ng Poly(A)+ |   | x | x |   |   | 893   |
| Smartseq.noPCR.b.ng.r42ss42 | 42 | 42 | Smart-seq, no PCR | Lymphocyte      | 100 ng Poly(A)+ |   | x | x |   |   | 1767  |
| Smartseq.noPCR.b.ng.r42ss72 | 42 | 72 | Smart-seq, no PCR | Lymphocyte      | 100 ng Poly(A)+ |   | x | x | x | x | 1836  |
| Smartseq.noPCR.c.ng.r25ss42 | 25 | 42 | Smart-seq, no PCR | Lymphocyte      | 1 µg Total RNA  |   | x | x |   | x | 13523 |
| Smartseq.noPCR.c.ng.r25ss72 | 25 | 72 | Smart-seq, no PCR | Lymphocyte      | 1 µg Total RNA  |   | x | x |   |   | 3996  |
| Smartseq.noPCR.c.ng.r42ss42 | 42 | 42 | Smart-seq, no PCR | Lymphocyte      | 1 µg Total RNA  |   | x | x |   |   | 4689  |
| Smartseq.noPCR.c.ng.r42ss72 | 42 | 72 | Smart-seq, no PCR | Lymphocyte      | 1 µg Total RNA  |   | x | x |   | x | 10196 |
| Smartseq.noPCR.d.ng.r25ss42 | 25 | 42 | Smart-seq, no PCR | Lymphocyte      | 100 ng Poly(A)+ | x | x | x |   | x | 5744  |
| Smartseq.noPCR.d.ng.r25ss72 | 25 | 72 | Smart-seq, no PCR | Lymphocyte      | 100 ng Poly(A)+ | x | x | x |   |   | 2880  |
| Smartseq.noPCR.d.ng.r42ss42 | 42 | 42 | Smart-seq, no PCR | Lymphocyte      | 100 ng Poly(A)+ | x | x | x |   |   | 5635  |
| Smartseq.noPCR.d.ng.r42ss72 | 42 | 72 | Smart-seq, no PCR | Lymphocyte      | 100 ng Poly(A)+ | x | x | x |   | x | 2420  |
| Smartseq.noPCR.e.ng.r25ss42 | 25 | 42 | Smart-seq, no PCR | Lymphocyte      | 100 ng Poly(A)+ |   | x | x |   | x | 3598  |
| Smartseq.noPCR.e.ng.r25ss72 | 25 | 72 | Smart-seq, no PCR | Lymphocyte      | 100 ng Poly(A)+ |   | x | x |   |   | 3558  |
| Smartseq.noPCR.e.ng.r42ss42 | 42 | 42 | Smart-seq, no PCR | Lymphocyte      | 100 ng Poly(A)+ |   | x | x |   |   | 4226  |
| Smartseq.noPCR.e.ng.r42ss72 | 42 | 72 | Smart-seq, no PCR | Lymphocyte      | 100 ng Poly(A)+ |   | x | x |   | x | 2753  |
| Smartseq.noPCR.f.ng.r25ss42 | 25 | 42 | Smart-seq, no PCR | Lymphocyte      | 100 ng Poly(A)+ |   | x | x |   | x | 3424  |
| Smartseq.noPCR.f.ng.r25ss72 | 25 | 72 | Smart-seq, no PCR | Lymphocyte      | 100 ng Poly(A)+ |   | x | x |   |   | 4847  |
| Smartseq.noPCR.f.ng.r42ss42 | 42 | 42 | Smart-seq, no PCR | Lymphocyte      | 100 ng Poly(A)+ |   | x | x |   |   | 3639  |
| Smartseq.noPCR.f.ng.r42ss72 | 42 | 72 | Smart-seq, no PCR | Lymphocyte      | 100 ng Poly(A)+ |   | x | x |   | x | 7234  |
| Smartseq.sc.r25ss42         | 25 | 42 | Smart-seq 2       | CD5+ lymphocyte | Single cell     |   | x |   |   | x | 224   |
| Smartseq.sc.r25ss72         | 25 | 72 | Smart-seq 2       | CD5+ lymphocyte | Single cell     |   | x |   |   |   | 236   |
| Smartseq.sc.r42ss42         | 42 | 42 | Smart-seq 2       | CD5+ lymphocyte | Single cell     |   | x |   |   |   | 179   |
| Smartseq.sc.r42ss72         | 42 | 72 | Smart-seq 2       | CD5+ lymphocyte | Single cell     |   | x |   |   | x | 0.62  |

**Table S1. Related to Figure 3. RNA-seq samples prepared in this study.**

| ID             | mRNA length (bases) | fwd primer            | rev primer                             | amplicon length (bases) | distance to 3' end of mRNA (bases) |
|----------------|---------------------|-----------------------|----------------------------------------|-------------------------|------------------------------------|
| NM_001100181.1 | 1913                | cctcctcatcccctctcttc  | gagttttggagcccatggtac                  | 178                     | 178                                |
| NM_001100181.1 | 1913                | cctcctcatcccctctcttc  | agttttggagcccatggtaca                  | 177                     | 178                                |
| NM_026389.3    | 1951                | ggagcttctttcaggccaac  | gcaagaatgaaaggacctctaac                | 108                     | 131                                |
| NM_026389.3    | 1951                | ggagcttctttcaggccaac  | gtgaaggaatcctaagacctggg                | 72                      | 131                                |
| NM_025989.3    | 1978                | ttcgattgcctggaaatgc   | gcaagggttgatgtattcaag                  | 143                     | 146                                |
| NM_025989.3    | 1978                | ttcgattgcctggaaatgc   | tgggattgcccctttcccat                   | 83                      | 146                                |
| NM_027949.1    | 1984                | gcccaggacagtgagataca  | ggagagatgacctttatttgtc                 | 226                     | 226                                |
| NM_027949.1    | 1984                | gcccaggacagtgagataca  | aggaagcacatgagagccac                   | 178                     | 226                                |
| NM_001081061.1 | 9921                | cccaggcaagacatagatgc  | ctacagaacattactgctttcttag              | 162                     | 199                                |
| NM_001081061.1 | 9921                | cccaggcaagacatagatgc  | acatggcacttgacattgaataa                | 72                      | 199                                |
| NM_013889.2    | 9977                | tggattgtgtgagtagttggt | aaatcaaccatgaaaaccacc                  | 133                     | 151                                |
| NM_013889.2    | 9977                | tggattgtgtgagtagttggt | acagtggccttaccaggat                    | 90                      | 151                                |
| NM_001160400.1 | 10040               | gcttgggactccttcttcc   | gtcttctccacactttattctttg               | 195                     | 197                                |
| NM_001160400.1 | 10040               | gcttgggactccttcttcc   | tgaccatgctgacatgcac                    | 143                     | 197                                |
| NM_001081203.1 | 10070               | cagggttcatttgcacaaa   | caaagtgcatttgtttaaattttatttaagaactttac | 156                     | 156                                |
| NM_054053.4    | 19327               | gcattgcttagtgtttgtgca | ggattccaatacttttattgatg                | 171                     | 171                                |

|                |       |                      |                                 |     |     |
|----------------|-------|----------------------|---------------------------------|-----|-----|
| NM_054053.4    | 19327 | gcattgcttagtgtttgca  | accatgtagccaagttcgga            | 134 | 171 |
| NM_054053.4    | 19327 | gcattgcttagtgtttgca  | gattattttcattaacctagcc          | 149 | 171 |
| NM_001033276.3 | 19825 | ccctgtccttgcatgtttt  | gttataaaacaaactttgaagaagcaaatcc | 114 | 142 |
| NM_001033276.3 | 19825 | ccctgtccttgcatgtttt  | ccaaaactgccccttgccct            | 83  | 142 |
| NM_001005510.2 | 21718 | ggtctggttgagctgtttg  | gagaacatctgagttgacatatc         | 81  | 112 |
| NM_010889.1    | 22489 | accaaaccagtccttcccaa | gttgcccatgaacagtttatttc         | 210 | 210 |
| NM_010889.1    | 22489 | accaaaccagtccttcccaa | aaacaagggaagggttct              | 95  | 210 |

**Table S2. Related to Figure 4; Related to Key Resources Table.** Genes and corresponding primers used in qPCR.
